# Supplementary material
Source: PubMed Central journal article supplement (PMC3448841)
Supplement: NIHMS386626-supplement-supplement_1.pdf [file NIHMS386626-supplement-supplement_1.pdf]

Supplementary eTable I. Summary of SNP Genotyping Failure Rates, Genotype Distributions and Tests of HWE in Control Mothers and Infants, California, 1999-2003

| SNP rs ID                    | Type          | Alleles <sup>b</sup> | Control Subjects |         | Genotyping                | Genotype 1/1 <sup>c</sup> | Genotype 1/2 <sup>c</sup> | Genotype 2/2 <sup>c</sup> |
|------------------------------|---------------|----------------------|------------------|---------|---------------------------|---------------------------|---------------------------|---------------------------|
|                              |               |                      | (* HWE <0.05)    |         | Failure Rate <sup>d</sup> | N (%)                     | N (%)                     | N (%)                     |
| <i>DHFR</i> (5) <sup>a</sup> |               |                      |                  |         |                           |                           |                           |                           |
| rs1650723                    | DS            | A/G                  | Hispanic         | Mother* | 26.09                     | 111 (0.82)                | 21 (0.15)                 | 4 (0.03)                  |
|                              |               |                      |                  | Child   | 20.07                     | 221 (0.80)                | 56 (0.20)                 | 0 (0)                     |
| rs1677693                    | Tag, intron   | A/C                  | White            | Mother  | 9.59                      | 51 (0.77)                 | 12 (0.18)                 | 3 (0.05)                  |
|                              |               |                      |                  | Child*  | 18.03                     | 75 (0.75)                 | 20 (0.2)                  | 5 (0.05)                  |
|                              |               |                      | Hispanic         | Mother* | 22.70                     | 104 (0.73)                | 30 (0.21)                 | 9 (0.06)                  |
|                              |               |                      |                  | Child   | 14.99                     | 210 (0.71)                | 78 (0.26)                 | 7 (0.02)                  |
| rs11951910                   | Tag, intron   | C/T                  | White            | Mother  | 13.70                     | 35 (0.56)                 | 23 (0.37)                 | 5 (0.08)                  |
|                              |               |                      |                  | Child   | 14.05                     | 64 (0.62)                 | 31 (0.30)                 | 9 (0.09)                  |
|                              |               |                      | Hispanic         | Mother  | 16.22                     | 1 (0.01)                  | 14 (0.09)                 | 140 (0.90)                |
|                              |               |                      |                  | Child   | 13.79                     | 1 (0)                     | 25 (0.08)                 | 274 (0.91)                |
| rs1076991                    | Tag, promoter | A/G                  | White            | Mother  | 8.00                      | 0 (0)                     | 18 (0.26)                 | 51 (0.74)                 |
|                              |               |                      |                  | Child   | 12.10                     | 1 (0.01)                  | 13 (0.12)                 | 95 (0.87)                 |
|                              |               |                      | Hispanic         | Mother* | 16.85                     | 82 (0.54)                 | 45 (0.29)                 | 26 (0.17)                 |
|                              |               |                      |                  | Child*  | 14.41                     | 146 (0.49)                | 109 (0.37)                | 42 (0.14)                 |
| rs8011839                    | Tag, intron   | C/T                  | White            | Mother  | 9.59                      | 34 (0.52)                 | 23 (0.35)                 | 9 (0.14)                  |
|                              |               |                      |                  | Child   | 13.12                     | 47 (0.44)                 | 46 (0.43)                 | 13 (0.12)                 |
|                              |               |                      | Hispanic         | Mother  | 12.64                     | 111 (0.70)                | 40 (0.25)                 | 8 (0.05)                  |
|                              |               |                      |                  | Child   | 11.59                     | 201 (0.66)                | 88 (0.29)                 | 16 (0.05)                 |
| rs1076991                    | Tag, promoter | A/G                  | White            | Mother  | 4.05                      | 50 (0.70)                 | 18 (0.25)                 | 3 (0.04)                  |
|                              |               |                      |                  | Child   | 11.38                     | 74 (0.68)                 | 29 (0.27)                 | 6 (0.06)                  |
|                              |               |                      | Hispanic         | Mother  | 12.64                     | 33 (0.21)                 | 70 (0.44)                 | 56 (0.35)                 |
|                              |               |                      |                  | Child   | 12.17                     | 73 (0.24)                 | 141 (0.47)                | 89 (0.29)                 |

| SNP rs ID  | Type                  | Alleles <sup>b</sup> | Control Subjects |         | Genotyping                | Genotype 1/1 <sup>c</sup> | Genotype 1/2 <sup>c</sup> | Genotype 2/2 <sup>c</sup> |
|------------|-----------------------|----------------------|------------------|---------|---------------------------|---------------------------|---------------------------|---------------------------|
|            |                       |                      | (* HWE <0.05)    |         | Failure Rate <sup>d</sup> | N (%)                     | N (%)                     | N (%)                     |
| rs1885031  | Tag, intron           | A/G                  | White            | Mother  | 4.05                      | 19 (0.27)                 | 31 (0.44)                 | 21 (0.30)                 |
|            |                       |                      |                  | Child   | 9.76                      | 23 (0.21)                 | 54 (0.49)                 | 34 (0.31)                 |
|            |                       |                      | Hispanic         | Mother  | 15.68                     | 4 (0.03)                  | 39 (0.25)                 | 113 (0.72)                |
|            |                       |                      |                  | Child   | 22.70                     | 11 (0.04)                 | 74 (0.28)                 | 184 (0.68)                |
|            |                       |                      | White            | Mother  | 5.41                      | 0 (0)                     | 9 (0.13)                  | 61 (0.87)                 |
|            |                       |                      |                  | Child   | 24.39                     | 0 (0)                     | 14 (0.15)                 | 79 (0.85)                 |
| rs1950902  | Tag, exon<br>NS K134R | C/T                  | Hispanic         | Mother  | 16.76                     | 3 (0.02)                  | 22 (0.14)                 | 129 (0.84)                |
|            |                       |                      |                  | Child   | 14.37                     | 5 (0.02)                  | 45 (0.15)                 | 248 (0.83)                |
|            |                       |                      | White            | Mother  | 6.67                      | 3 (0.04)                  | 15 (0.21)                 | 52 (0.74)                 |
|            |                       |                      |                  | Child   | 14.52                     | 5 (0.05)                  | 28 (0.26)                 | 73 (0.69)                 |
|            |                       |                      | Hispanic         | Mother* | 13.26                     | 54 (0.34)                 | 47 (0.30)                 | 56 (0.36)                 |
|            |                       |                      |                  | Child   | 13.37                     | 83 (0.28)                 | 146 (0.49)                | 69 (0.23)                 |
| rs2236224  | Tag, intron           | C/T                  | White            | Mother  | 10.81                     | 11 (0.17)                 | 28 (0.42)                 | 27 (0.41)                 |
|            |                       |                      |                  | Child   | 11.38                     | 22 (0.20)                 | 50 (0.46)                 | 37 (0.34)                 |
|            |                       |                      | Hispanic         | Mother* | 19.89                     | 53 (0.37)                 | 46 (0.32)                 | 46 (0.32)                 |
|            |                       |                      |                  | Child   | 15.12                     | 96 (0.33)                 | 140 (0.48)                | 56 (0.19)                 |
|            |                       |                      | White            | Mother* | 8.22                      | 17 (0.25)                 | 25 (0.37)                 | 25 (0.37)                 |
|            |                       |                      |                  | Child   | 18.85                     | 26 (0.26)                 | 46 (0.46)                 | 27 (0.27)                 |
| rs2236225  | Tag, exon<br>NS R653Q | C/T                  | Hispanic         | Mother* | 12.90                     | 154 (0.95)                | 7 (0.04)                  | 1 (0.01)                  |
|            |                       |                      |                  | Child   | 11.46                     | 282 (0.91)                | 26 (0.08)                 | 1 (0)                     |
|            |                       |                      | White            | Mother  | 9.33                      | 55 (0.81)                 | 13 (0.19)                 | 0 (0)                     |
|            |                       |                      |                  | Child   | 11.29                     | 95 (0.86)                 | 15 (0.14)                 | 0 (0)                     |
|            |                       |                      | Hispanic         | Mother* | 19.34                     | 24 (0.16)                 | 43 (0.29)                 | 79 (0.54)                 |
|            |                       |                      |                  | Child*  | 13.08                     | 37 (0.12)                 | 104 (0.35)                | 158 (0.53)                |
| rs3783728  | Tag, intron           | C/T                  | White            | Mother  | 12.50                     | 8 (0.13)                  | 22 (0.35)                 | 33 (0.52)                 |
|            |                       |                      |                  | Child   | 11.57                     | 10 (0.09)                 | 47 (0.44)                 | 50 (0.47)                 |
|            |                       |                      | Hispanic         | Mother* | 13.59                     | 10 (0.06)                 | 40 (0.25)                 | 109 (0.69)                |
|            |                       |                      |                  | Child   | 10.66                     | 10 (0.03)                 | 90 (0.29)                 | 210 (0.68)                |
|            |                       |                      | White            | Mother  | 9.33                      | 55 (0.81)                 | 13 (0.19)                 | 0 (0)                     |
|            |                       |                      |                  | Child   | 11.29                     | 95 (0.86)                 | 15 (0.14)                 | 0 (0)                     |
| rs11158542 | Tag,<br>upstream      | C/T                  | Hispanic         | Mother* | 19.34                     | 24 (0.16)                 | 43 (0.29)                 | 79 (0.54)                 |
|            |                       |                      |                  | Child*  | 13.08                     | 37 (0.12)                 | 104 (0.35)                | 158 (0.53)                |
|            |                       |                      | White            | Mother  | 12.50                     | 8 (0.13)                  | 22 (0.35)                 | 33 (0.52)                 |
|            |                       |                      |                  | Child   | 11.57                     | 10 (0.09)                 | 47 (0.44)                 | 50 (0.47)                 |
|            |                       |                      | Hispanic         | Mother* | 13.59                     | 10 (0.06)                 | 40 (0.25)                 | 109 (0.69)                |
|            |                       |                      |                  | Child   | 10.66                     | 10 (0.03)                 | 90 (0.29)                 | 210 (0.68)                |
| rs11627387 | Tag, intron           | A/G                  | Hispanic         | Mother* | 13.59                     | 10 (0.06)                 | 40 (0.25)                 | 109 (0.69)                |
|            |                       |                      |                  | Child   | 10.66                     | 10 (0.03)                 | 90 (0.29)                 | 210 (0.68)                |
|            |                       |                      | White            | Mother  | 9.33                      | 55 (0.81)                 | 13 (0.19)                 | 0 (0)                     |
|            |                       |                      |                  | Child   | 11.29                     | 95 (0.86)                 | 15 (0.14)                 | 0 (0)                     |
|            |                       |                      | Hispanic         | Mother* | 19.34                     | 24 (0.16)                 | 43 (0.29)                 | 79 (0.54)                 |
|            |                       |                      |                  | Child*  | 13.08                     | 37 (0.12)                 | 104 (0.35)                | 158 (0.53)                |

| SNP rs ID                                  | Type                          | Alleles <sup>b</sup> | Control Subjects |         | Genotyping                | Genotype 1/1 <sup>c</sup> | Genotype 1/2 <sup>c</sup> | Genotype 2/2 <sup>c</sup> |
|--------------------------------------------|-------------------------------|----------------------|------------------|---------|---------------------------|---------------------------|---------------------------|---------------------------|
|                                            |                               |                      | (* HWE <0.05)    |         | Failure Rate <sup>d</sup> | N (%)                     | N (%)                     | N (%)                     |
| rs11849530                                 | Tag, intron                   | A/G                  | White            | Mother  | 5.48                      | 10 (0.14)                 | 24 (0.35)                 | 35 (0.51)                 |
|                                            |                               |                      |                  | Child   | 9.84                      | 12 (0.11)                 | 47 (0.43)                 | 51 (0.46)                 |
|                                            |                               |                      | Hispanic         | Mother* | 17.84                     | 89 (0.59)                 | 45 (0.30)                 | 18 (0.12)                 |
|                                            |                               |                      |                  | Child*  | 13.79                     | 176 (0.59)                | 96 (0.32)                 | 28 (0.09)                 |
|                                            |                               |                      |                  |         |                           |                           |                           |                           |
| rs34616731                                 | Promoter                      | A/T                  | White            | Mother  | 9.46                      | 40 (0.60)                 | 22 (0.33)                 | 5 (0.07)                  |
|                                            |                               |                      |                  | Child   | 15.45                     | 61 (0.59)                 | 38 (0.37)                 | 5 (0.05)                  |
|                                            |                               |                      | Hispanic         | Mother* | 14.52                     | 12 (0.08)                 | 43 (0.27)                 | 104 (0.65)                |
|                                            |                               |                      |                  | Child   | 21.55                     | 9 (0.03)                  | 78 (0.29)                 | 186 (0.68)                |
|                                            |                               |                      |                  |         |                           |                           |                           |                           |
| <i>MTHFR</i> (1) <sup>a</sup><br>rs1476413 | Intron                        | A/G                  | Hispanic         | Mother  | 10.33                     | 119 (0.72)                | 42 (0.25)                 | 4 (0.02)                  |
|                                            |                               |                      |                  | Child   | 18.79                     | 99 (0.74)                 | 33 (0.25)                 | 2 (0.01)                  |
|                                            |                               |                      | White            | Mother  | 2.70                      | 45 (0.63)                 | 22 (0.31)                 | 5 (0.07)                  |
|                                            |                               |                      |                  | Child   | 13.43                     | 36 (0.62)                 | 17 (0.29)                 | 5 (0.09)                  |
|                                            |                               |                      |                  |         |                           |                           |                           |                           |
| rs1801131                                  | Exon, NS<br>E429A<br>(A1298C) | A/C                  | Hispanic         | Mother  | 16.22                     | 7 (0.05)                  | 40 (0.26)                 | 108 (0.7)                 |
|                                            |                               |                      |                  | Child   | 21.33                     | 12 (0.04)                 | 87 (0.32)                 | 174 (0.64)                |
|                                            |                               |                      | White            | Mother  | 13.33                     | 5 (0.08)                  | 22 (0.34)                 | 38 (0.58)                 |
|                                            |                               |                      |                  | Child*  | 17.74                     | 12 (0.12)                 | 30 (0.29)                 | 60 (0.59)                 |
|                                            |                               |                      |                  |         |                           |                           |                           |                           |
| rs1801133                                  | Exon, NS<br>A222V<br>(C677T)  | C/T                  | Hispanic         | Mother  | 11.41                     | 40 (0.25)                 | 78 (0.48)                 | 45 (0.28)                 |
|                                            |                               |                      |                  | Child   | 24.85                     | 27 (0.22)                 | 52 (0.42)                 | 45 (0.36)                 |
|                                            |                               |                      | White            | Mother  | 2.70                      | 14 (0.19)                 | 34 (0.47)                 | 24 (0.33)                 |
|                                            |                               |                      |                  | Child   | 17.91                     | 10 (0.18)                 | 23 (0.42)                 | 22 (0.40)                 |
|                                            |                               |                      |                  |         |                           |                           |                           |                           |
| <i>SHMT1</i> (17) <sup>a</sup><br>rs669340 | Tag, intron                   | C/G                  | Hispanic         | Mother  | 17.03                     | 61 (0.40)                 | 64 (0.42)                 | 26 (0.17)                 |

| SNP rs ID  | Type            | Alleles <sup>b</sup> | Control Subjects |         | Genotyping                | Genotype 1/1 <sup>c</sup> | Genotype 1/2 <sup>c</sup> | Genotype 2/2 <sup>c</sup> |           |
|------------|-----------------|----------------------|------------------|---------|---------------------------|---------------------------|---------------------------|---------------------------|-----------|
|            |                 |                      | (* HWE <0.05)    |         | Failure Rate <sup>d</sup> | N (%)                     | N (%)                     | N (%)                     |           |
| rs1979277  | DS, NS<br>L474F | A/G                  | Hispanic         | Child   | 12.79                     | 152 (0.51)                | 116 (0.39)                | 32 (0.11)                 |           |
|            |                 |                      |                  | White   | Mother                    | 5.33                      | 31 (0.44)                 | 27 (0.38)                 | 13 (0.18) |
|            |                 |                      |                  | Child   | 8.07                      | 53 (0.46)                 | 50 (0.44)                 | 11 (0.10)                 |           |
|            |                 |                      |                  | Mother* | 31.52                     | 9 (0.07)                  | 33 (0.26)                 | 84 (0.67)                 |           |
|            |                 |                      |                  | Child   | 19.60                     | 22 (0.08)                 | 109 (0.39)                | 148 (0.53)                |           |
|            |                 |                      |                  | White   | Mother*                   | 13.70                     | 10 (0.16)                 | 15 (0.24)                 | 38 (0.60) |
| rs2168781  | Tag, intron     | C/G                  | Hispanic         | Child   | 18.85                     | 8 (0.08)                  | 45 (0.45)                 | 46 (0.46)                 |           |
|            |                 |                      |                  | Mother  | 16.76                     | 54 (0.36)                 | 66 (0.44)                 | 29 (0.19)                 |           |
|            |                 |                      |                  | Child   | 12.90                     | 81 (0.27)                 | 140 (0.47)                | 76 (0.26)                 |           |
|            |                 |                      |                  | White   | Mother                    | 14.87                     | 24 (0.38)                 | 27 (0.43)                 | 12 (0.19) |
|            |                 |                      |                  | Child   | 13.82                     | 33 (0.31)                 | 51 (0.48)                 | 22 (0.21)                 |           |
|            |                 |                      |                  | Mother  | 12.97                     | 118 (0.73)                | 36 (0.22)                 | 7 (0.04)                  |           |
| rs2273026  | Tag, intron     | A/G                  | Hispanic         | Child*  | 14.08                     | 206 (0.69)                | 76 (0.25)                 | 17 (0.06)                 |           |
|            |                 |                      |                  | White   | Mother                    | 6.76                      | 57 (0.83)                 | 11 (0.16)                 | 1 (0.01)  |
|            |                 |                      |                  | Child*  | 12.20                     | 91 (0.84)                 | 14 (0.13)                 | 3 (0.03)                  |           |
|            |                 |                      |                  | Mother* | 22.28                     | 15 (0.10)                 | 37 (0.26)                 | 91 (0.64)                 |           |
|            |                 |                      |                  | Child   | 17.00                     | 19 (0.07)                 | 105 (0.36)                | 164 (0.57)                |           |
|            |                 |                      |                  | White   | Mother                    | 10.96                     | 4 (0.06)                  | 21 (0.32)                 | 40 (0.62) |
| rs9909104  | Tag, intron     | C/T                  | Hispanic         | Child   | 16.39                     | 9 (0.09)                  | 41 (0.4)                  | 52 (0.51)                 |           |
|            |                 |                      |                  | Mother* | 13.26                     | 103 (0.66)                | 42 (0.27)                 | 12 (0.08)                 |           |
|            |                 |                      |                  | Child   | 10.76                     | 176 (0.57)                | 109 (0.36)                | 22 (0.07)                 |           |
|            |                 |                      |                  | White   | Mother                    | 8.22                      | 40 (0.60)                 | 21 (0.31)                 | 6 (0.09)  |
|            |                 |                      |                  | Child   | 6.56                      | 52 (0.46)                 | 52 (0.46)                 | 10 (0.09)                 |           |
|            |                 |                      |                  | Mother* | 15.76                     | 11 (0.07)                 | 43 (0.28)                 | 101 (0.65)                |           |
| rs12939757 | Tag, DS         | A/G                  | Hispanic         | Child   | 12.97                     | 21 (0.07)                 | 118 (0.39)                | 163 (0.54)                |           |
|            |                 |                      |                  | White   | Mother*                   | 9.46                      | 11 (0.16)                 | 18 (0.27)                 | 38 (0.57) |
|            |                 |                      |                  | Child   | 17.07                     | 8 (0.08)                  | 47 (0.46)                 | 47 (0.46)                 |           |

| SNP rs ID                     | Type          | Alleles <sup>b</sup> | Control Subjects |         | Genotyping                | Genotype 1/1 <sup>c</sup> | Genotype 1/2 <sup>c</sup> | Genotype 2/2 <sup>c</sup> |
|-------------------------------|---------------|----------------------|------------------|---------|---------------------------|---------------------------|---------------------------|---------------------------|
|                               |               |                      | (* HWE <0.05)    |         | Failure Rate <sup>d</sup> | N (%)                     | N (%)                     | N (%)                     |
| <i>TYMS</i> (18) <sup>a</sup> |               |                      |                  |         |                           |                           |                           |                           |
| rs502396                      | Tag, promoter | C/T                  | Hispanic         | Mother  | 18.23                     | 29 (0.20)                 | 60 (0.41)                 | 59 (0.40)                 |
|                               |               |                      |                  | Child*  | 15.12                     | 61 (0.21)                 | 123 (0.42)                | 108 (0.37)                |
|                               |               |                      | White            | Mother  | 10.81                     | 22 (0.33)                 | 30 (0.45)                 | 14 (0.21)                 |
|                               |               |                      |                  | Child*  | 15.45                     | 38 (0.37)                 | 41 (0.39)                 | 25 (0.24)                 |
| rs699517                      | Tag, DS       | C/T                  | Hispanic         | Mother  | 15.68                     | 83 (0.53)                 | 55 (0.35)                 | 18 (0.12)                 |
|                               |               |                      |                  | Child   | 11.49                     | 140 (0.45)                | 130 (0.42)                | 38 (0.12)                 |
|                               |               |                      | White            | Mother  | 10.81                     | 29 (0.44)                 | 31 (0.47)                 | 6 (0.09)                  |
|                               |               |                      |                  | Child   | 7.32                      | 53 (0.46)                 | 43 (0.38)                 | 18 (0.16)                 |
| rs1001761                     | Tag, intron   | C/T                  | Hispanic         | Mother* | 18.13                     | 28 (0.19)                 | 59 (0.40)                 | 62 (0.42)                 |
|                               |               |                      |                  | Child*  | 14.78                     | 56 (0.19)                 | 125 (0.43)                | 113 (0.38)                |
|                               |               |                      | White            | Mother  | 13.51                     | 17 (0.27)                 | 29 (0.45)                 | 18 (0.28)                 |
|                               |               |                      |                  | Child*  | 13.82                     | 34 (0.32)                 | 41 (0.39)                 | 31 (0.29)                 |
| rs2847153                     | Tag, intron   | A/G                  | Hispanic         | Mother  | 14.13                     | 3 (0.02)                  | 51 (0.32)                 | 104 (0.66)                |
|                               |               |                      |                  | Child   | 13.55                     | 12 (0.04)                 | 93 (0.31)                 | 195 (0.65)                |
|                               |               |                      | White            | Mother  | 6.85                      | 2 (0.03)                  | 23 (0.34)                 | 43 (0.63)                 |
|                               |               |                      |                  | Child   | 9.84                      | 7 (0.06)                  | 36 (0.33)                 | 67 (0.61)                 |
| rs2847149                     | Tag, intron   | A/G                  | Hispanic         | Mother* | 16.94                     | 31 (0.20)                 | 54 (0.36)                 | 67 (0.44)                 |
|                               |               |                      |                  | Child*  | 15.90                     | 56 (0.19)                 | 123 (0.42)                | 112 (0.38)                |
|                               |               |                      | White            | Mother  | 12.50                     | 18 (0.29)                 | 30 (0.48)                 | 15 (0.24)                 |
|                               |               |                      |                  | Child*  | 11.57                     | 33 (0.31)                 | 42 (0.39)                 | 32 (0.30)                 |
| rs2847326                     | Tag, DS       | A/T                  | Hispanic         | Mother  | 17.84                     | 20 (0.13)                 | 57 (0.38)                 | 75 (0.49)                 |
|                               |               |                      |                  | Child   | 14.12                     | 20 (0.07)                 | 118 (0.40)                | 160 (0.54)                |
|                               |               |                      | White            | Mother  | 9.46                      | 3 (0.04)                  | 20 (0.30)                 | 44 (0.66)                 |
|                               |               |                      |                  | Child*  | 10.57                     | 12 (0.11)                 | 31 (0.28)                 | 67 (0.61)                 |

Abbreviations: *DHFR*, dihydrofolate reductase; DS, downstream; HWE, Hardy-Weinberg equilibrium; *MTHFD1*, methylenetetrahydrofolate dehydrogenase; *MTHFR*, methylenetetrahydrofolate reductase; NS, non-synonymous; *SHMT1*, cytoplasmic serine hydroxymethyltransferase; *TYMS*, thymidylate synthase.

\**HWE P* values < 0.05 were excluded from further analyses.

<sup>a</sup> Chromosome.

<sup>b</sup> SNP alleles, minor allele shown in bold.

<sup>c</sup> Shown as n with (frequencies).

<sup>d</sup> % of subgroup with undiscriminated or discordant (with duplicate) genotypes.
